# Supplementary material for: Mixed dimensionality of 2D/3D heterojunctions for improving charge transport and long-term stability in high-efficiency 1.63 eV bandgap perovskite solar cells
Source: Royal Society of Chemistry journal article supplement (doi:10.1039/d2ma00391k), 2022-01-01
Supplement: d2ma00391k1.pdf [file d2ma00391k1.pdf]

## Supporting Information

### **Mixed dimensionality of 2D/3D heterojunction for improving charge transport and long-term stability in high- efficiency 1.63-eV bandgap perovskite solar cells**

*Jinkun Jiang<sup>a</sup>, Congcong Tian<sup>a</sup>, Zhiang Zhang<sup>a</sup>, Xiao (Xiao) Liu<sup>a</sup>, Xin Wang<sup>a</sup>, Yiting Zheng<sup>a</sup>, Zhanfei Zhang<sup>a</sup>, Luyao Wang<sup>a</sup>, Xueyun Wu<sup>a</sup>, Jianghu Liang<sup>a</sup>, Chun-Chao Chen<sup>a\*</sup>*

*<sup>a</sup>School of Materials Science and Engineering, Shanghai Jiao Tong University, Shanghai, 200240, P. R. China*

\*Corresponding author: [c3chen@sjtu.edu.cn](mailto:c3chen@sjtu.edu.cn)

## Experimental section

**Materials.** Lead iodide (PbI<sub>2</sub>), lead bromide (PbBr<sub>2</sub>), methylammonium bromide (MABr), lithium bis (trifluoromethylsulfonyl) imide (Li-TFSI), and 2,2',7,7'-tetrakis-(N,N-di-p-methoxyphenylamine)-9,9'-spirobifluorene (Spiro-OMeTAD) were purchased from Xi'an Polymer Light Technology. Cesium iodide (CsI), rubidium iodide (RbI), N,N-dimethylformamide (DMF), chlorobenzene (CB), and 4-tert-butylpyridine (4-tBP) were purchased from Sigma-Aldrich. R- $\alpha$ -methylbenzylamine, R- $\alpha$ -methyl-4-fluorobenzylammonium hydrochloride (R- $\alpha$ -FMBACl), and dimethyl sulfoxide (DMSO) were purchased from Meryer. Acetonitrile was purchased from Aladdin. Formamidinium iodide (FAI) was purchased from Greatcell. R- $\alpha$ -methyl-4-chlorobenzylammonium hydrochloride (R- $\alpha$ -ClMBACl) was purchased from Leyan. R- $\alpha$ -methyl-4-bromobenzylammonium hydrochloride (R- $\alpha$ -BrMBACl) was purchased from Macklin. Isopropanol (IPA) was purchased from J&K Scientific. Hydrochloric acid (HCl) and ether were purchased from Sinopharm Chemical Reagent. Ethanol was purchased from Energy Chemical. [6,6]-phenyl-C61-butyric acid methyl ester (PCBM) was purchased from Liaoning Tech. Tin oxide colloid precursor (SnO<sub>2</sub>) was purchased from Alfa Aesar. All above materials were used without further purification.

**Synthesis of R- $\alpha$ -MBACl.** R- $\alpha$ -MBACl was synthesized by reacting R- $\alpha$ -methylbenzylamine and HCl (molar ratio 1:1) in ethanol at 0 °C for 4 h with stirring. The precipitates were recovered by evaporating the solution at 50 °C for 1 h. The product was dissolved in ethanol, recrystallized from diethyl ether, and finally dried at 60 °C in a vacuum oven for 24 h.

**Device fabrication.** FTO glass was cleaned through sonication in IPA, detergent, deionized water, acetone, and IPA, respectively. Before use, the FTO substrates were dried with air gas and treated by UV-ozone for 15 min. SnO<sub>2</sub> thin film was prepared by spin-coating colloidal solution on the FTO substrates at 3000 rpm in ambient air, then annealed on a hot plate at 150 °C. Perovskite precursor solution Rb<sub>0.05</sub>Cs<sub>0.05</sub>(FAPbI<sub>3</sub>)<sub>0.87</sub>(MAPbBr<sub>3</sub>)<sub>0.13</sub> (1.3 M) was spin-coated on the SnO<sub>2</sub> substrates at 5000 rpm for 35 s. CB was dropped on the spinning substrates during the last 5 s. Subsequently, the films were annealed at 100 °C to form perovskites. The solution of different organic ligands (R- $\alpha$ -MBA, R- $\alpha$ -FMBA, R- $\alpha$ -ClMBA, R- $\alpha$ -BrMBA) at 4 mg/mL in IPA was spin-coating onto the perovskite films, and then annealed on a hot plate at 100 °C for 10 min. Spiro-OMeTAD solution containing 72.3 mg Spiro-OMeTAD, 17.5  $\mu$ L Li-TFSI solution (520 mg Li-TFSI in acetonitrile), and 30  $\mu$ L 4-tBP in 1 mL CB was spin-coated on the perovskite films. Finally, 100 nm of Ag electrode was deposited on the film through thermal evaporation under vacuum of  $1 \times 10^{-5}$  Pa. The accurate active cell area was 0.09959 cm<sup>2</sup> defined a non-reflective mask for the efficiency measurement.

**Characterization.** X-ray diffraction (XRD) patterns were conducted employing a D8 ADVANCE Da Vinci diffractometer and Cu-K $\alpha$  radiation with the scanning rate of 10°/min. The top-view and cross-sectional morphologies were characterized by a JSM-

7800F scanning electron microscopy (SEM). Roughness of the films was acquired via a FastScan Bio Atomic Force Microscope (AFM). Steady-state photoluminescence (PL) and time-resolved photoluminescence (TRPL) spectra were performed with a FLS1000 PL spectrometer with an excitation at 450 nm. Transient absorption (TA) was conducted on a Ultrafast Systems LLC Helios pump-probe system combined with an amplified femtosecond laser system. Ultraviolet-visible (UV-vis) absorption spectra were acquired by a EV300 UV-vis spectrophotometer. X-ray photoelectron spectroscopy (XPS) and ultraviolet photoelectron spectroscopy (UPS) were obtained on a AXIS UltraDLD spectrometer. Current density-voltage ( $J$ - $V$ ) curves of the PSCs were measured using a Keithley 2400 source meter under 1 sun illumination at  $100 \text{ mW cm}^{-2}$  (AM 1.5G) using an Abet Technologies Sun 2000 solar simulator. The light intensity was calibrated using a standard silicon reference cell. Both of the reverse (1.2 V to -0.1 V) and forward (-0.1 V to 1.2 V) scans were measured using a scan rate of  $0.02 \text{ V s}^{-1}$ . Current density-time ( $J_{\text{SC}}$ -t), power conversion efficiency-time (PCE-t), space charge-limited current (SCLC), and dark  $J$ - $V$  curves were measured on the Keithley 2400 source meter. External Quantum Efficiency (EQE) spectra were recorded via a Qtest Hifinity 5 EQE measurement system. Electrochemical Impedance Spectroscopy (EIS) and Mott-Schottky (M-S) curves were performed using a CorrTest CS350M electrochemical workstation. Water contact angle was obtained by a DSA100 instrument.

**Computational details.** First-principles calculations based on the density functional theory were implemented in the Vienna ab initio simulation package.<sup>1,2</sup> Perdew-Burke-Ernzerh (PBE) functional within the generalized gradient approximation (GGA) was selected as the exchange-correlation function.<sup>3</sup> The valence-core interactions were described via the projector-augmented-wave (PAW) pseudopotentials.<sup>4</sup> A plane-wave cut-off energy of 500 eV was used. The energy and force convergence criteria were set to  $10^{-5}$  eV and  $0.02 \text{ eV \AA}^{-1}$ , respectively. The formation energy of  $n = 1$  2D perovskites was calculated as the following formula:

$$E_{\text{formation}}(2D) = E_{\text{DFT}}(2D) - 2E_{\text{DFT}}(\text{XMBA}) - E_{\text{DFT}}(\text{PbI}_2).$$

Iodide migration activation energy was modeled for  $\text{MAPbI}_3$ ,  $\text{MBAPbI}_3$  and  $\text{BrMBAPbI}_3$  in which the MA cation was replaced by a MBA/BrMBA cation in a single cell for the latter two cases. The parameters of the perovskite surface model were  $6 \text{ \AA} \times 6 \text{ \AA} \times 14 \text{ \AA}$ . The thickness of the vacuum layer is  $10 \text{ \AA}$ . The  $k$ -points grid sampling size was set as  $2 \times 2 \times 1$  in the Brillouin Zone.  $V_{\text{I}}$  vacancy was initially set corresponding to the defect in the initial and final structure respectively. After the initial and final structures were optimized, a linear interpolation consisting of ten grid points between them were employed to define the migration process. The energy profiles were examined using climbing-nudged elastic band (CI-NEB) and constrained energy minimization methods.

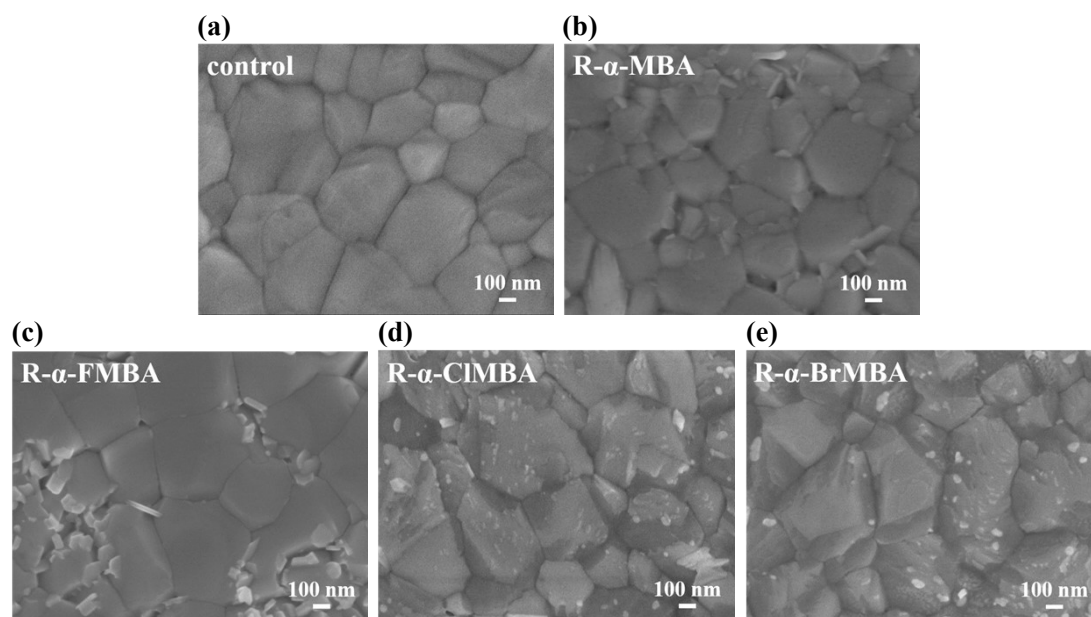

**Figure S1.** SEM images of surface morphology for perovskite films modified with different ligands (a) control, (b) R- $\alpha$ -MBA, (c) R- $\alpha$ -FMBA, (d) R- $\alpha$ -CIMBA and (e) R- $\alpha$ -BrMBA.

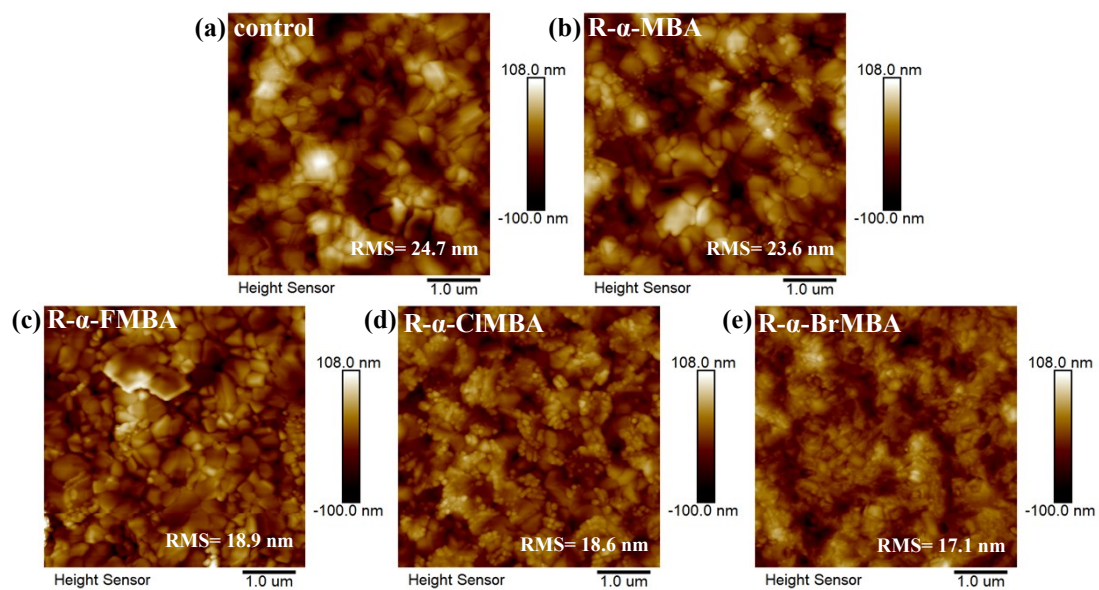

**Figure S2.** AFM images of perovskite films modified with different ligands (a) control, (b) R- $\alpha$ -MBA, (c) R- $\alpha$ -FMBA, (d) R- $\alpha$ -CIMBA and (e) R- $\alpha$ -BrMBA.

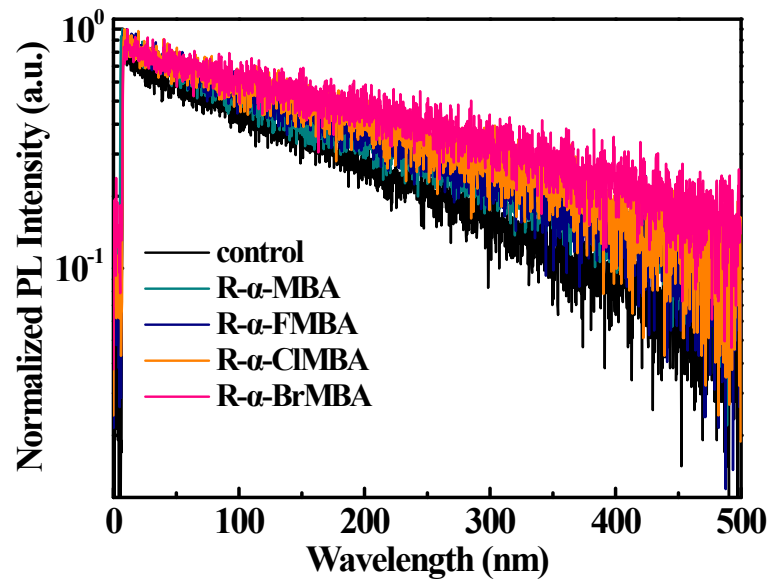

**Figure S3.** TRPL spectra of perovskite films modified with different organic ligands.

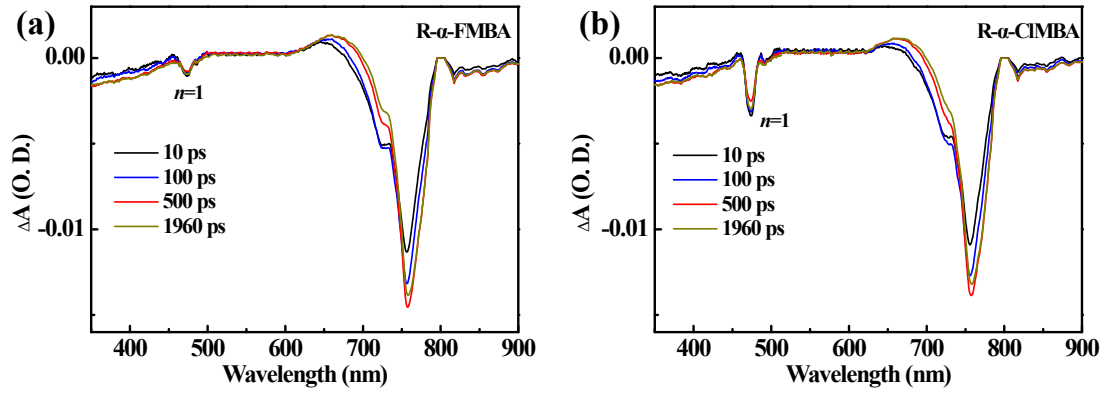

**Figure S4.** TA spectra for the (a) R- $\alpha$ -FMBA- and (b) R- $\alpha$ -CIMBA-modified perovskite films.

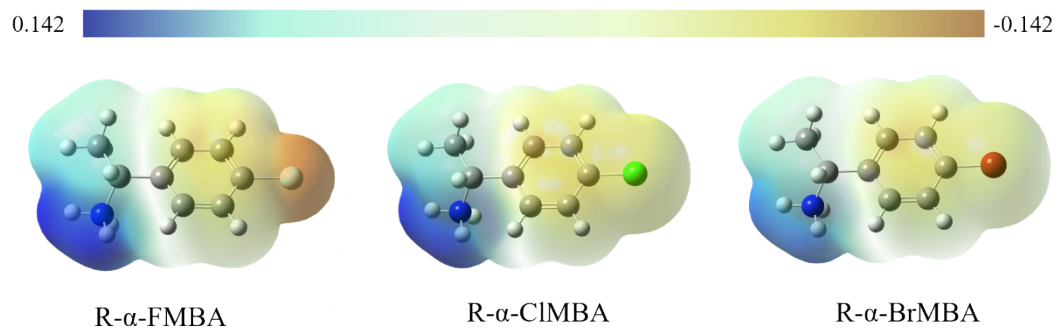

**Figure S5.** Electrostatic surface potential maps of the halogen-substituted aromatic ligands.



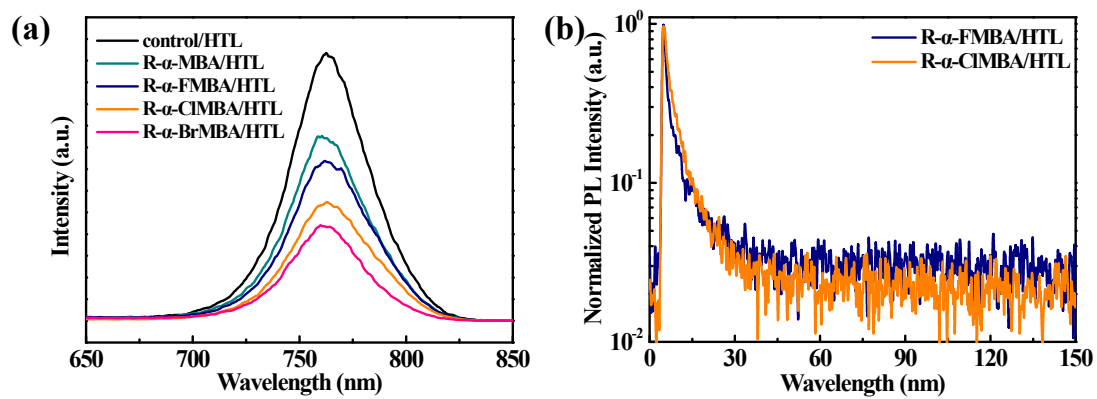

**Figure S6.** (a) Steady-state PL spectra of perovskite/HTL films with and without modification. (b) TRPL spectra of perovskite/HTL films modified with R- $\alpha$ -FMBA and R- $\alpha$ -BrMBA.

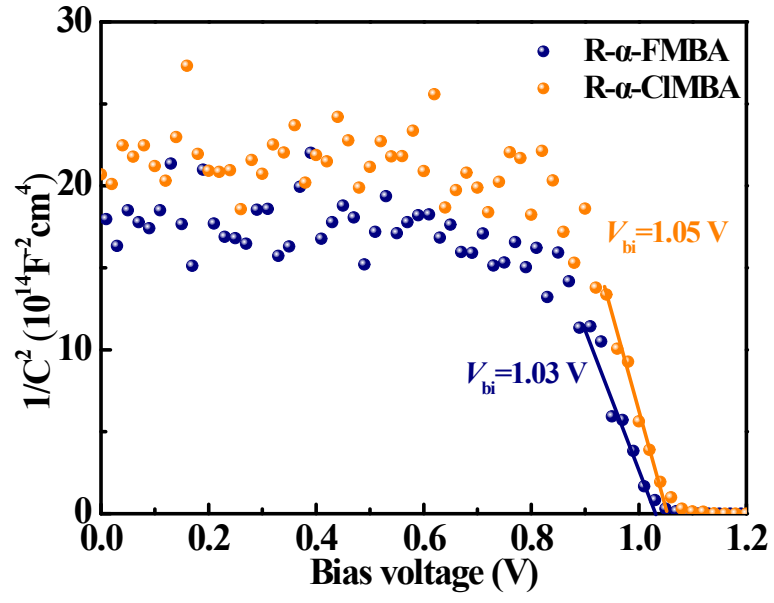

Figure S7. Mott-Schottky curves for different perovskite devices.

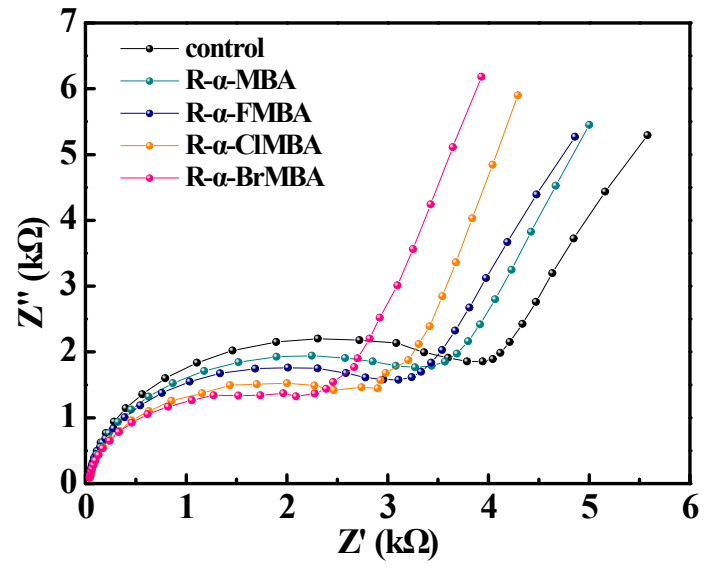

**Figure S8.** Nyquist plots of different perovskite devices.

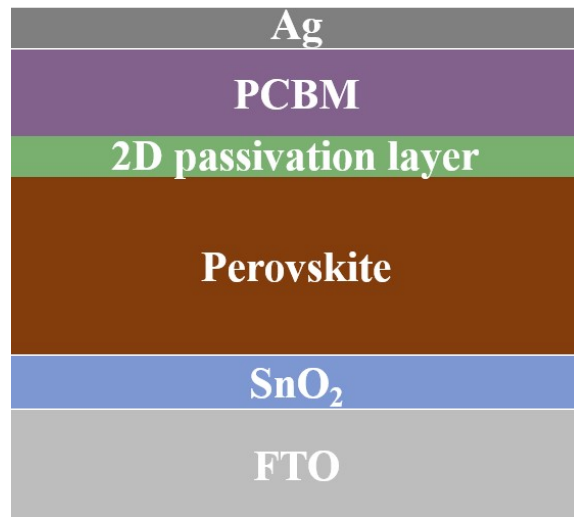

**Figure S9.** Schematic diagram of electron-only device.

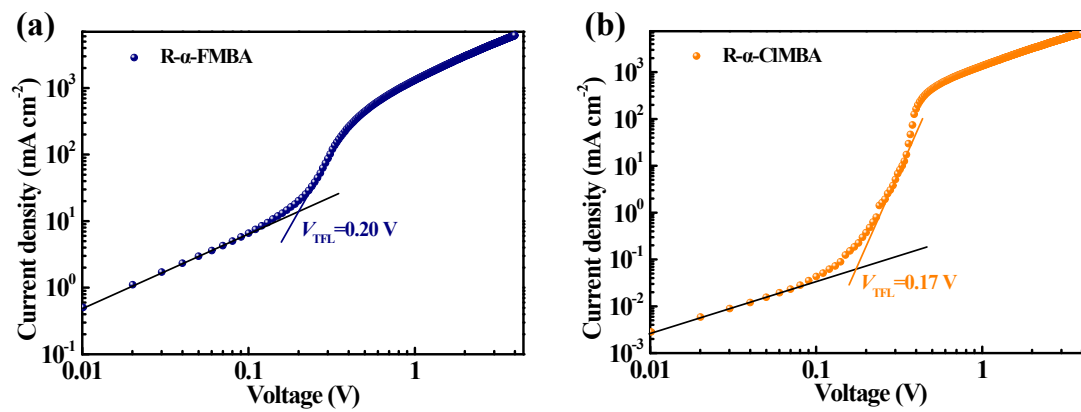

Figure S10. SCLC curves for different perovskite devices.

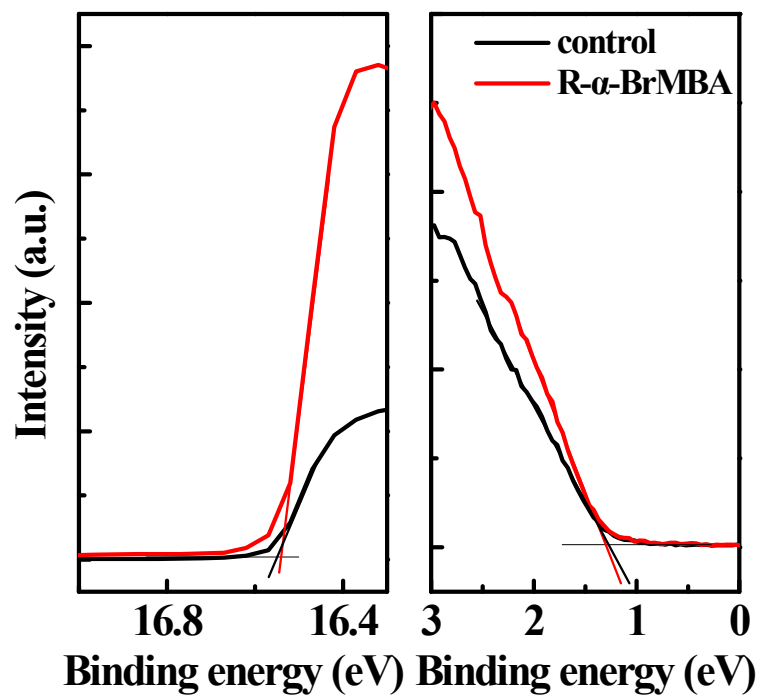

**Figure S11.** UPS spectra of secondary electron cutoff and valence band of the 3D and Br-2D/3D films.

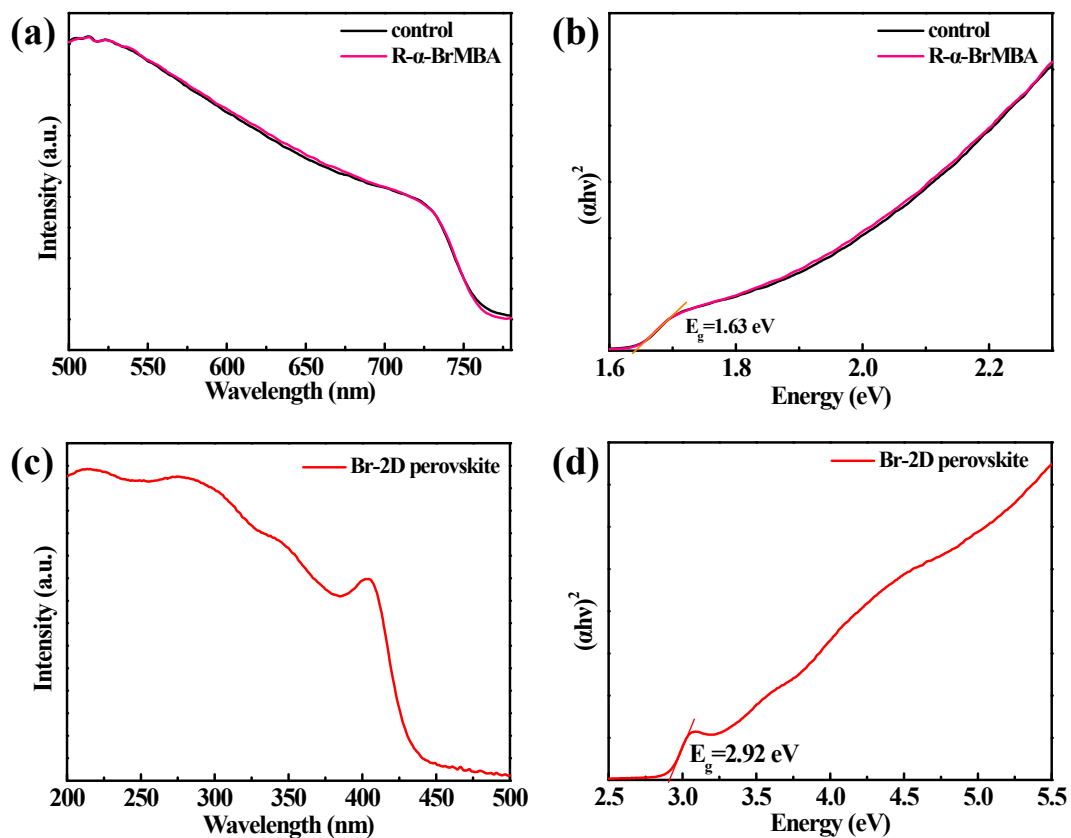

**Figure S12.** UV-vis spectra of (a) perovskite films with and without R- $\alpha$ -BrMBA modification and (c) Br-2D perovskite film. Tauc plots of the (b) 3D and Br-2D/3D films and (d) Br-2D perovskite film.

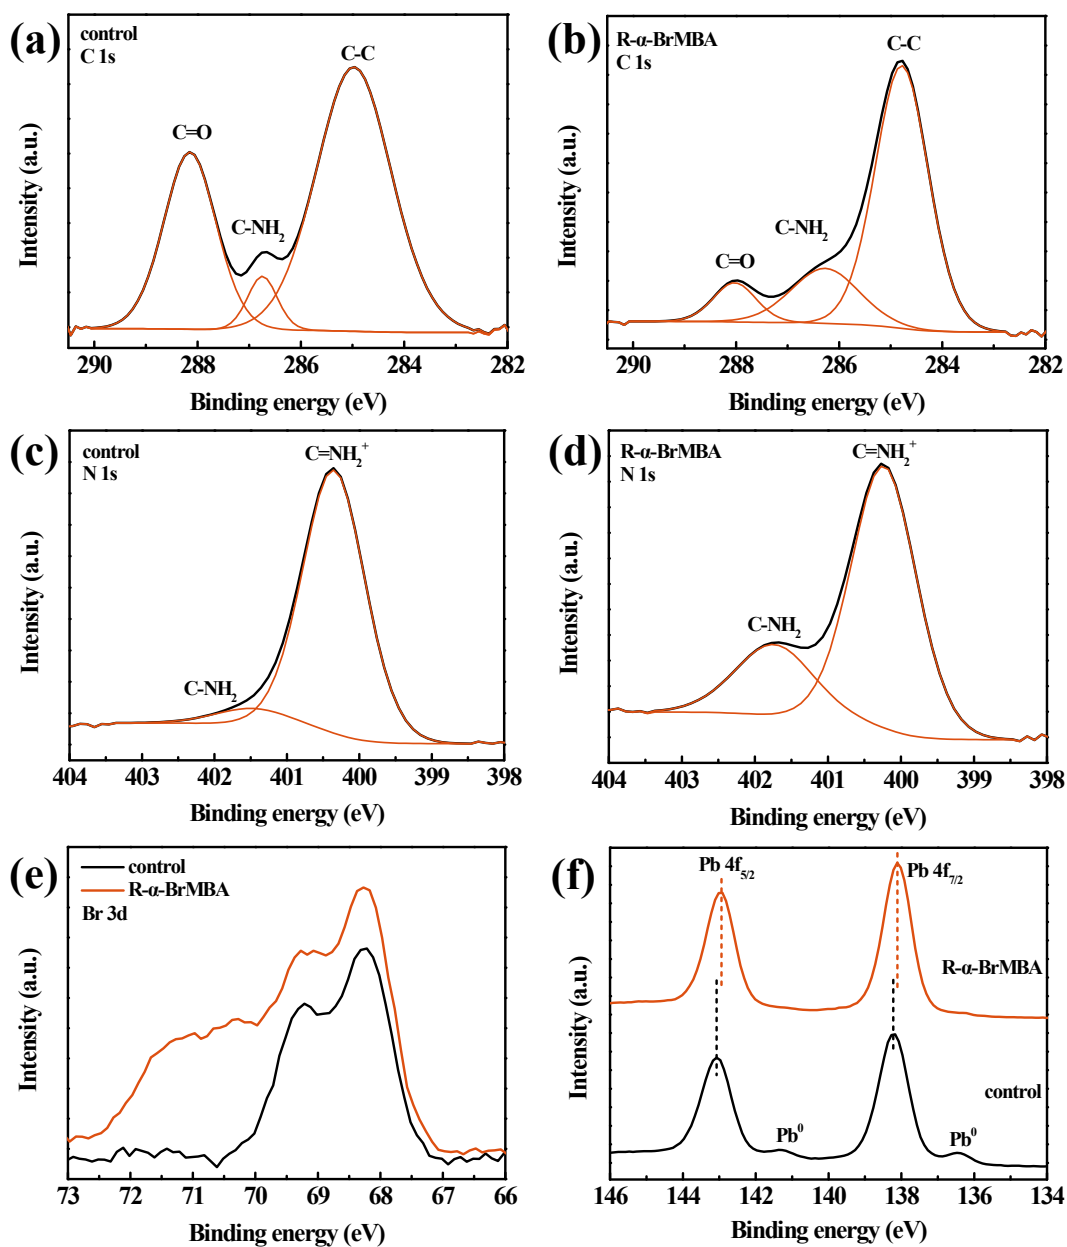

**Figure S13.** XPS spectra of (a) C 1s for 3D perovskite film, (b) C 1s for Br-2D/3D perovskite film, (c) N 1s for 3D perovskite film, (d) N 1s of Br-2D/3D perovskite film, (e) Br 3d for 3D and Br-2D/3D perovskite films, and (f) Pb 4f for 3D and Br-2D/3D perovskite films.



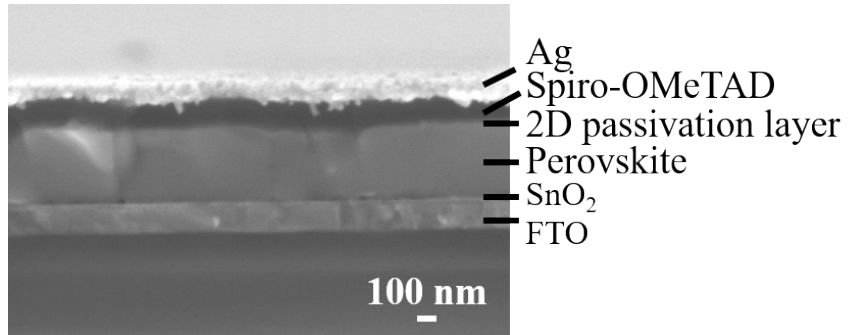

**Figure S14.** Cross-sectional SEM image of device.

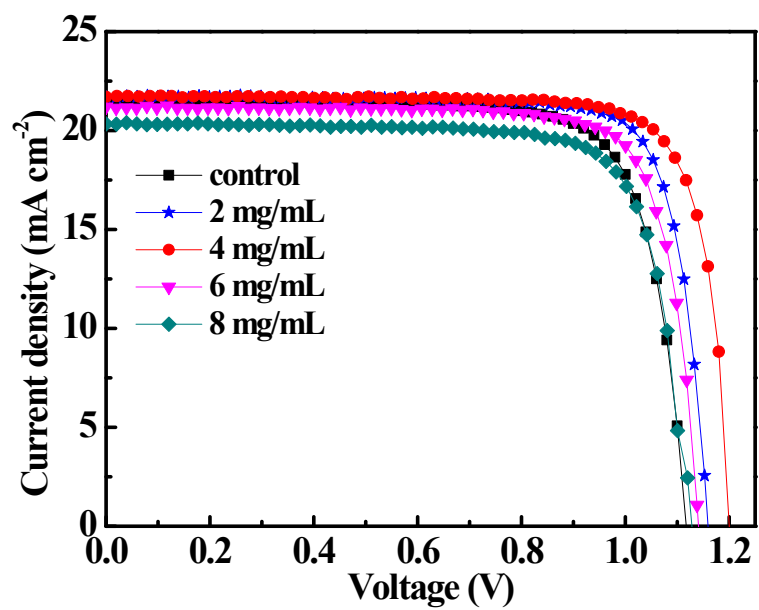

**Figure S15.** *J-V* curves of PSCs modified with different concentration of R- $\alpha$ -BrMBA.

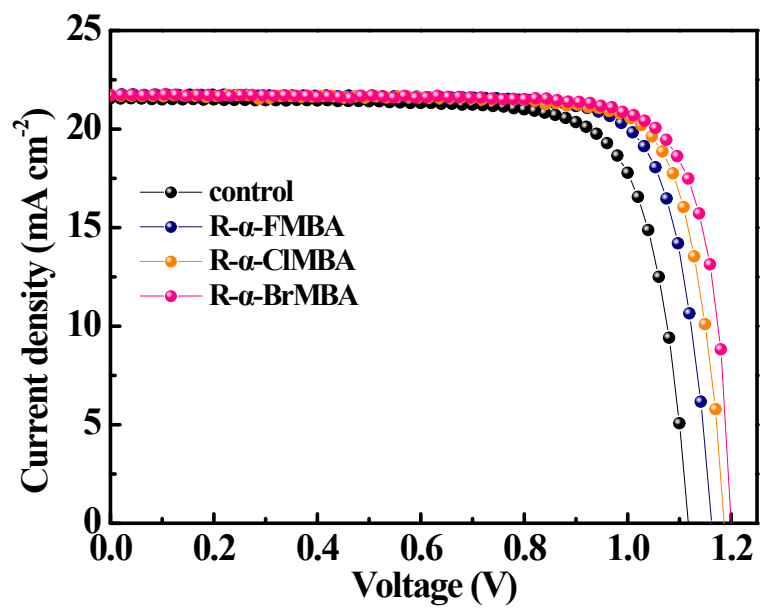

**Figure S16.** *J-V* curves of PSCs modified with different halogen-substituted ligands.

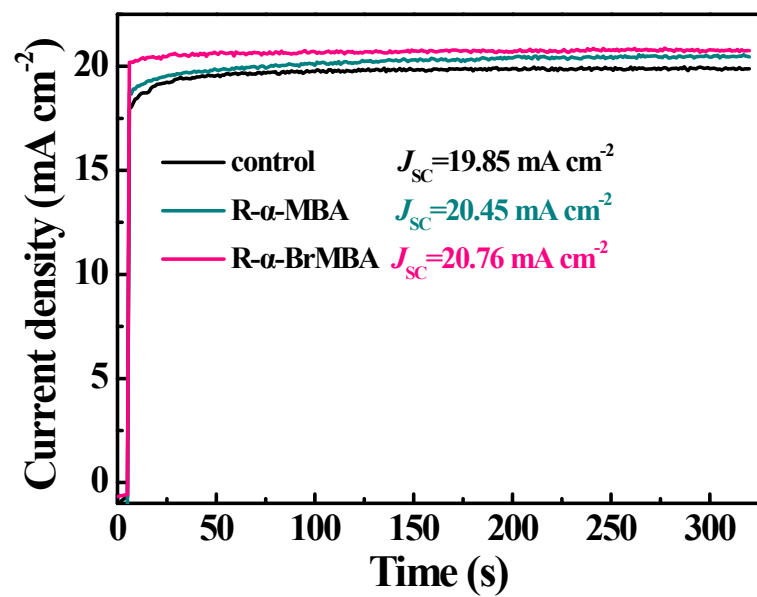

**Figure S17.** Steady-state current density of perovskite devices with different modification.

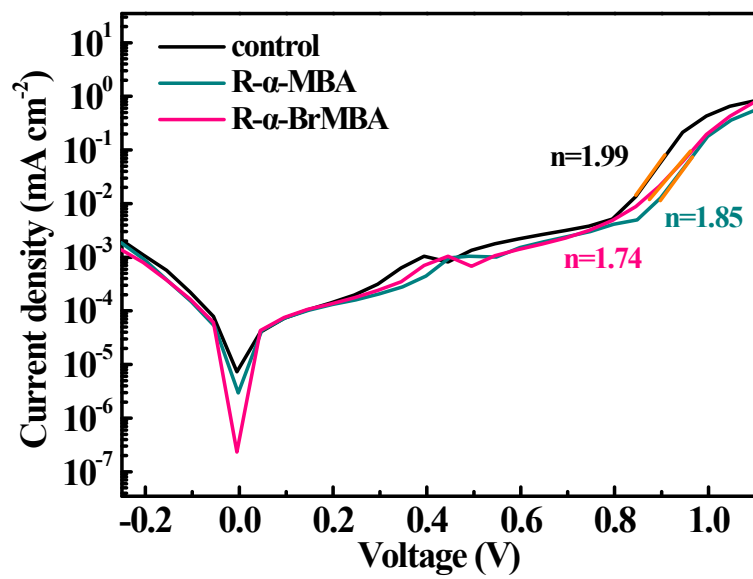

Figure S18. Dark J-V curves of different PSCs.

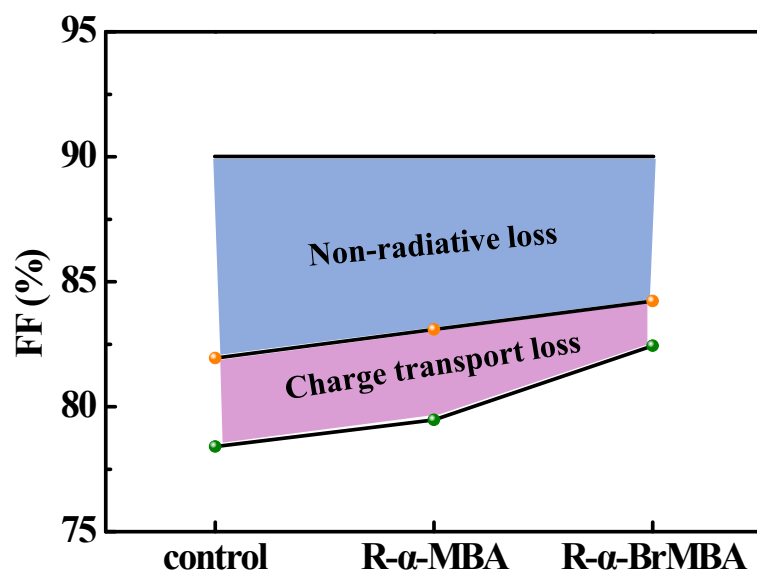

**Figure S19.** The device FF loss consists of non-radiative loss (blue region) and charge transport loss (purple region), the green and the orange circles represent the measured FF and the calculated FF maximum without charge transport loss, respectively.

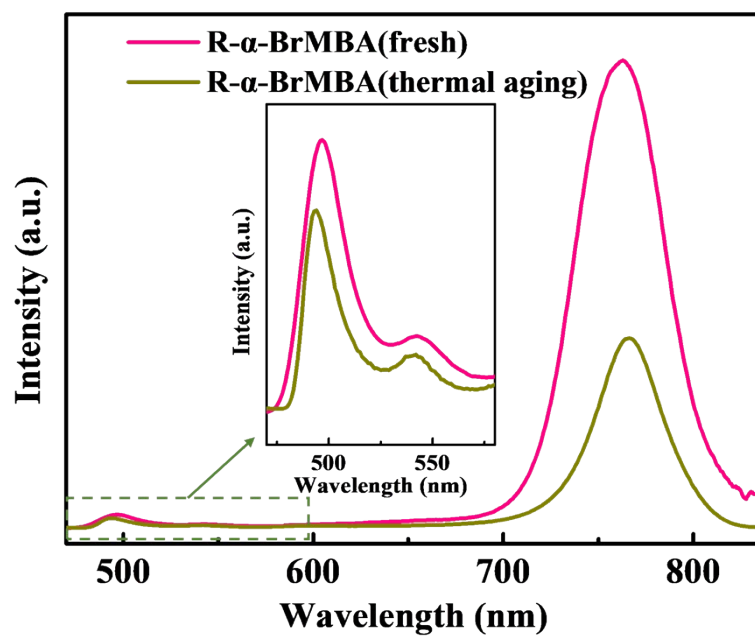

**Figure S20.** PL spectra of fresh and thermal aged (annealed at 60 °C for 8 days) perovskite films modified with R- $\alpha$ -BrMBA.

**Table S1.** TRPL decay curves fitted results of perovskite films modified with different organic ligands

| Samples            | $\tau_1$ (ns) | $\tau_2$ (ns) | $A_1$ (%) | $A_2$ (%) | $\tau_{avg}$ (ns) |
|--------------------|---------------|---------------|-----------|-----------|-------------------|
| Control            | 9.54          | 221.96        | 0.63      | 99.37     | 221.90            |
| R- $\alpha$ -MBA   | 41.83         | 307.10        | 4.56      | 95.44     | 305.38            |
| R- $\alpha$ -FMBA  | 31.14         | 315.48        | 1.58      | 98.42     | 315.03            |
| R- $\alpha$ -CIMBA | 43.90         | 470.72        | 0.78      | 99.22     | 470.41            |
| R- $\alpha$ -BrMBA | 17.13         | 541.36        | 0.19      | 99.81     | 541.33            |

**Table S2.** TRPL decay curves fitted results of perovskite/Spiro-OMeTAD films modified with different ligands

| Samples            | $\tau_1$ (ns) | $\tau_2$ (ns) | $A_1$ (%) | $A_2$ (%) | $\tau_{avg}$ (ns) |
|--------------------|---------------|---------------|-----------|-----------|-------------------|
| Control            | 3.13          | 13.38         | 35.38     | 64.62     | 12.72             |
| R- $\alpha$ -MBA   | 1.35          | 9.55          | 33.37     | 66.63     | 9.02              |
| R- $\alpha$ -FMBA  | 0.84          | 7.35          | 30.09     | 69.91     | 7.04              |
| R- $\alpha$ -CIMBA | 1.6           | 7.06          | 32.00     | 68.00     | 6.53              |
| R- $\alpha$ -BrMBA | 0.7           | 5.78          | 16.72     | 83.28     | 5.65              |

**Table S3.** Values of  $R_{ct}$  and  $R_{rec}$  calculated from the EIS plots

| Samples            | $R_{ct}$ (k $\Omega$ ) | $R_{rec}$ (k $\Omega$ ) |
|--------------------|------------------------|-------------------------|
| Control            | 4.66                   | 31.7                    |
| R- $\alpha$ -MBA   | 4.06                   | 59.36                   |
| R- $\alpha$ -FMBA  | 4.00                   | 98.50                   |
| R- $\alpha$ -CIMBA | 3.64                   | 251.16                  |
| R- $\alpha$ -BrMBA | 3.22                   | 299.10                  |



**Table S4.** The charge mobility ( $\mu$ ) and trap density ( $N_t$ ) of different devices calculated from SCLC curves

| Samples            | $V_{TFL}$ (V) | $N_t$ ( $\times 10^{15}$ cm $^{-3}$ ) | $\mu$ ( $\times 10^{-2}$ cm $^2$ V $^{-1}$ s $^{-1}$ ) |
|--------------------|---------------|---------------------------------------|--------------------------------------------------------|
| Control            | 0.28          | 9.08                                  | 1.38                                                   |
| R- $\alpha$ -MBA   | 0.22          | 7.13                                  | 1.62                                                   |
| R- $\alpha$ -FMBA  | 0.20          | 6.16                                  | 1.79                                                   |
| R- $\alpha$ -ClMBA | 0.17          | 4.86                                  | 1.85                                                   |
| R- $\alpha$ -BrMBA | 0.14          | 4.22                                  | 1.97                                                   |

**Table S5.** Photovoltaic parameters for PSCs modified with different concentration of R- $\alpha$ -BrMBA

| Samples | $V_{OC}$ (V) | $J_{SC}$ (mA cm $^{-2}$ ) | FF (%) | PCE (%) |
|---------|--------------|---------------------------|--------|---------|
| Control | 1.12         | 21.60                     | 78.41  | 18.97   |
| 2 mg/mL | 1.16         | 21.74                     | 81.27  | 20.49   |
| 4 mg/mL | 1.20         | 21.71                     | 82.44  | 21.48   |
| 6 mg/mL | 1.14         | 21.25                     | 79.96  | 19.37   |
| 8 mg/mL | 1.12         | 20.39                     | 77.92  | 17.79   |

**Table S6.** Photovoltaic parameters for PSCs modified with different halogen-substituted ligands

| Samples            | $V_{OC}$ (V) | $J_{SC}$ (mA cm $^{-2}$ ) | FF (%) | PCE (%) |
|--------------------|--------------|---------------------------|--------|---------|
| Control            | 1.12         | 21.60                     | 78.41  | 18.97   |
| R- $\alpha$ -FMBA  | 1.16         | 21.67                     | 80.82  | 20.32   |
| R- $\alpha$ -ClMBA | 1.18         | 21.69                     | 81.54  | 20.87   |
| R- $\alpha$ -BrMBA | 1.20         | 21.71                     | 82.44  | 21.48   |

**Table S7.** Reported Performance of the quadruple-cation (RbCsFAMA) PSCs

| Year | PCE(%) | $V_{oc}$ (V) | FF(%) | Passivation Method             | Stability<br>(% of PCE after # of hours at %RH/°C)                         | Ref                |
|------|--------|--------------|-------|--------------------------------|----------------------------------------------------------------------------|--------------------|
| 2016 | 21.60  | 1.18         | 81.00 | None                           | 95%<br>/500h/85°C/Nitrogen glovebox                                        | Ref. <sup>5</sup>  |
| 2017 | 21.10  | 1.16         | 78.00 | None                           | None                                                                       | Ref. <sup>6</sup>  |
| 2018 | 20.86  | 1.21         | 76.10 | Interfacial engineering        | None                                                                       | Ref. <sup>7</sup>  |
| 2019 | 20.92  | 1.12         | 79.00 | Additive engineering           | 95%/96h/40 ± 5%RH/<br>unencapsulated                                       | Ref. <sup>8</sup>  |
| 2020 | 20.92  | 1.14         | 79.82 | Interfacial engineering        | 83%/480h/30%RH<br>unencapsulated                                           | Ref. <sup>9</sup>  |
| 2021 | 17.71  | 1.19         | 80.30 | Interfacial engineering        | 90%/500h/30 ± 5%RH<br>unencapsulated                                       | Ref. <sup>10</sup> |
| 2021 | 20.35  | 1.13         | 81.53 | two-step sequential deposition | 86%/672h/20%RH/25°C<br>unencapsulated                                      | Ref. <sup>11</sup> |
| 2021 | 21.54  | 1.24         | 77.65 | Interfacial engineering        | 100%/45days/30%RH/<br>unencapsulated                                       | Ref. <sup>12</sup> |
| 2021 | 21.56  | 1.21         | 80.11 | Interfacial engineering        | 70%/720h/30 ± 5%RH/<br>unencapsulated                                      | Ref. <sup>13</sup> |
| 2022 | 21.48  | 1.20         | 82.44 | Interfacial engineering        | 90%/1000h/35 ± 5%RH/<br>unencapsulated<br>87%/216h/60°C/<br>unencapsulated | This work          |

## References

1. G. Kresse, *Phys. Rev. B*, 1996, **54**, 11169.
2. G. Kresse and J. Furthmüller, *Comput. Mater. Sci.*, 1996, **6**, 15-50.
3. J. P. Perdew, K. Burke and M. Ernzerhof, *Phys. Rev. Lett.*, 1996, **77**, 3865.
4. P. E. Blochl, *Phys. Rev. B* 1994, **50**, 17953-17979.
5. M. Saliba, T. Matsui, K. Domanski, J.-Y. Seo, A. Ummadisingu, S. M. Zakeeruddin, J.-P. Correa-Baena, W. R. Tress, A. Abate, A. Hagfeldt and M. Grätzel, *Science*, 2016, **354**, 206-209.
6. P. Yadav, M. I. Dar, N. Arora, E. A. Alharbi, F. Giordano, S. M. Zakeeruddin and M. Gratzel, *Adv. Mater.*, 2017, **29**, 1701077.
7. J. Peng, J. I. Khan, W. Liu, E. Ugur, T. Duong, Y. Wu, H. Shen, K. Wang, H. Dang, E. Aydin, X. Yang, Y. Wan, K. J. Weber, K. R. Catchpole, F. Laquai, S. Wolf and T. P. White, *Adv. Energy Mater.*, 2018, **8**, 1801208.

8. J. V. Patil, S. S. Mali and C. K. Hong, *Nanoscale*, 2019, **11**, 21824-21833.
9. X. Liu, Y. Cheng, B. Tang, Z. G. Yu, M. Li, F. Lin, S. Zhang, Y.-W. Zhang, J. Ouyang and H. Gong, *Nano Energy*, 2020, **71**, 104556.
10. K. M. Reza, A. Gurung, B. Bahrami, A. H. Chowdhury, N. Ghimire, R. Pathak, S. I. Rahman, M. A. R. Laskar, K. Chen, R. S. Bobba, B. S. Lamsal, L. K. Biswas, Y. Zhou, B. Logue and Q. Qiao, *Sol. RRL*, 2021, **5**, 2000740.
11. X. Liu, Z. Wu, X. Fu, L. Tang, J. Li, J. Gong and X. Xiao, *Nano Energy*, 2021, **86**, 106114.
12. G. Yang, Z. Ren, K. Liu, M. Qin, W. Deng, H. Zhang, H. Wang, J. Liang, F. Ye, Q. Liang, H. Yin, Y. Chen, Y. Zhuang, S. Li, B. Gao, J. Wang, T. Shi, X. Wang, X. Lu, H. Wu, J. Hou, D. Lei, S. K. So, Y. Yang, G. Fang and G. Li, *Nat. Photonics*, 2021, **15**, 681–689.
13. Z. Zhang, J. Jiang, X. Xiao Liu, X. Wang, L. Wang, Y. Qiu, Z. Zhang, Y. Zheng, X. Wu, J. Liang, C. Tian and C. C. Chen, *Small*, 2022, **18**, e2105184.
